# Supplementary material for: Polyamine-Based Organo-Clays for Polluted Water Treatment: Effect of Polyamine Structure and Content
Source: MDPI journal article supplement (doi:10.3390/polym11050897), 2019-05-16
Supplement: s1 [file s1]

# Supplementary Materials: Polyamine-Based Organo-Clays for Polluted Water Treatment: Effect of Polyamine Structure and Content

Cinzia Cristiani, Elena Maria Iannicelli-Zubiani, Giovanni Dotelli, Elisabetta Finocchio, Paola Gallo Stampino and Maurizio Licchelli

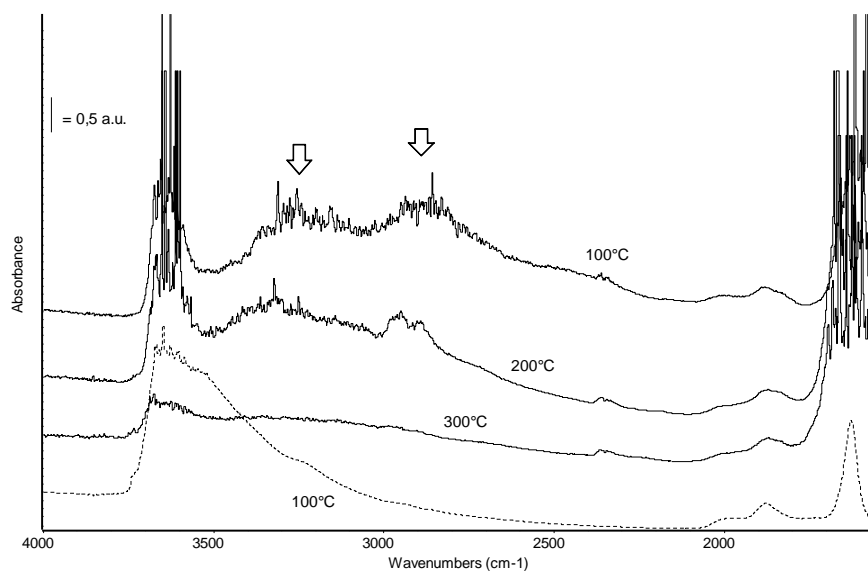

**Figure S1.** FT IR spectra of organo-clay L6-70 pure powder at increasing temperatures. Broken line: pure STx reference spectrum recorded at 100 °C. Arrows: bands assigned to L6 amine.
